# Supplementary material
Source: Royal Society of Chemistry journal article supplement (doi:10.1039/d6gc00637j)
Supplement: d6gc00637j1.pdf [file d6gc00637j1.pdf]

## Supplementary Information

### A.1: Criticality indicators:

Details on the different considered criticality criteria are available in the SI of the ref. <sup>1</sup>. All criticality related indicators have been calculated using Eq. 1:

$$Cr_{CAM} = \frac{1}{M_C} \sum_i x_i I_{i,j} M_i \frac{1}{Q_{th}} \quad (1)$$

Where

$M_C$ =molar mass of final product

$M_C$ =molar mass of raw material

$x_i$ =molar stoichiometry

$I_{i,j}$ =Criticality indicator for considered raw material

$Q_{th}$ =theoretical energy density

Results have been rescaled to 1-100 using according to the minimum and maximum values provided in the different studies to make them comparable as shown via Eq. 2 and Eq. 3. The Normalization depends on min or max orientations e.g. import reliance should be minimized, whilst eof of life return rate should be maximized:

$$Cre, up = \frac{max_{re} - min_{re}}{max_{base} - min_{base}} * (x - max_{based}) + max_{new} \quad (2)$$

or

$$Cre, down = \frac{max_{re} - min_{re}}{max_{base} - min_{base}} * (x - min_{based}) + min_{new} \quad (3)$$

All numeric results for the normalization are provided in the SI of the ref. <sup>1</sup>.

### A.2: Carbon Footprint:

The carbon footprint calculation is based on an LCA-approach to calculate global warming potentials (GWP<sub>100</sub>) using ecoinvent database version 3.8. The impacts for the market mix of each material precursor are calculated using the Environmental Footprint (EF) 3.0 methodology as recommended by the EC <sup>1</sup>. Material precursors including all upstream processes and the

impacts of material synthesis are considered here. Synthesis steps are assumed to take place in Europe using an average electricity mix (heat and electricity). Infrastructure and possible auxiliary inputs, are disregarding as there is no information available on specific requirements of all considered CAM, and the impact of auxiliary input for CAM synthesis is typically negligible. A simplified system boundary is provided in Figure A1.

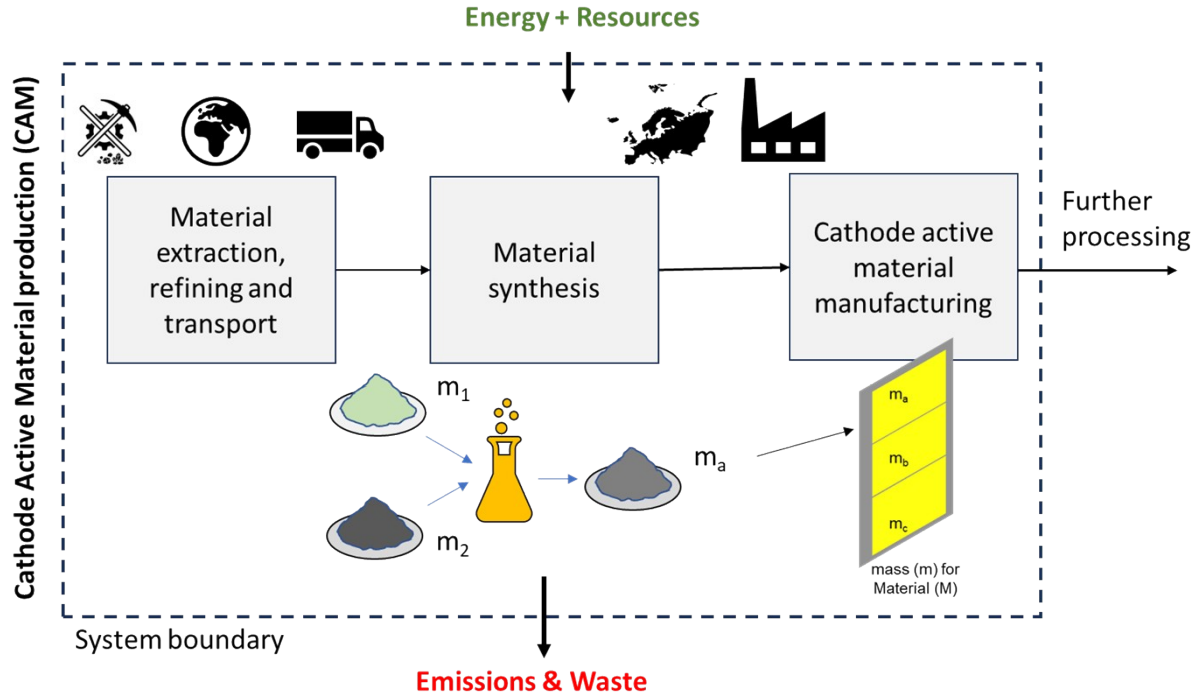

Figure A 1: Simple system boundary scheme for CAM production of different sodium ion batteries in frame of the LCA oriented assessment

### A. 3: HFL-MCDM methodology:

The working principle of HFLTS is as follows:

Step 1:  $X$  is a set. HFS is a function which is a subset of  $[0, 1]$  and is represented as Eq. 4.

$$E = \{ \langle x, h_E(x) \rangle \mid x \in X \} \quad (4)$$

A set of membership functions ( $n$ ) is defined as  $M = \{ \mu_1, \mu_2, \mu_3, \dots, \mu_n \}$ . The HFS,  $h_m$ , is associated with  $M$  and described as

$$h_M: M \rightarrow [0, 1] \quad (5)$$

$$h_M(x) = \bigcup_{\mu \in M} \{ \mu(x) \} \quad (6)$$

A set of linguistic terms is defined as  $S$ ,  $S = \{S_0, S_1, \dots, S_g\}$ . An  $H_s$  is a subset of the sequential linguistic terms of  $S$ .

The lower and upper bounds of HFLTS are  $H_s^-$  and  $H_s^+$  respectively and is expressed as Eqs. 7 and 8:

$$H_s^- = \min(S_i) = s_j, s_i \in H_s \text{ and } s_i \leq s_j \forall_i \quad (7)$$

$$H_s^+ = \max(S_i) = s_j, s_i \in H_s \text{ and } s_i \geq s_j \forall_i \quad (8)$$

The function  $E_{GH}$  that transforms the words in HFLTS,  $H_s$ .  $E_{GH}$  utilises the linguistic terms set in  $S$  is an out-of-context grammar and  $S_{||}$  is the expression generated by Eq. 9:

$$env(H_s) = [H_s^-, H_s^+], H_s^- \leq H_s^+ \quad (9)$$

The key benefits of these techniques include allowing decision-makers to express their choices more easily, especially in situations involving uncertainty or hesitation, through the use of linguistic term sets. Additionally, the model offers a wide range of linguistic expression options due to its high flexibility. It also supports the natural adoption of expressions while preserving their uniqueness. For these reasons, this method is particularly valuable when multiple factors need to be considered<sup>2-6</sup>.

#### **A.4: HFL-TOPSIS:**

This approach also shows similar characteristics to the proposed methodology. Thus, this method is used to validate the rank of the alternative based on the calculated weights of the criteria. This approach is a distance-based MCDM and calculates the alternatives from the ideal solution<sup>7</sup>. In this method the positive and negative ideal solutions are estimated depending on the criterion type. Then from the positive and negative ideal solutions, the distances (Euclidean distance) of each alternative are measured. By using these values, the relative closeness is identified and with the highest closeness value, the ranking has been done. In this work, the TOPSIS method is integrated with HFLTS to overcome the limitations of linguistic uncertainties. The scale is shown in Table A.3<sup>8</sup>. The steps of this method are as follows<sup>9</sup>.

Step 1: The positive ideal solution (PIS) and negative ideal solution (NIS) are estimated by using Eqs. 10 and 11.

$$A^* = (h_1^*, h_2^*, \dots, h_n^*), \text{ where } h_j^* = U_{i=1}^m h_{ij} \quad (10)$$

$$A^- = (h_1^-, h_2^-, \dots, h_n^-), \text{ where } h_j^- = \prod_{i=1}^m h_{ij} \quad (11)$$

Step 2: The distance from the ideal solution of each value is estimated by using Eqs. 12 and 13. The hesitant normalised Euclidean distance is proposed for this purpose.

$$D_i^* = \sum_{j=1}^n \| h_{ij} - h_j^* \| * W_j \quad (12)$$

$$D_i^- = \sum_{j=1}^n \| h_{ij} - h_j^- \| * W_j \quad (13)$$

Where  $W_j$  is the crisp value of the weights of the criterion. It is calculated by using the HFL-AHP method.

Step 3: The relative closeness index is calculated and the rank of the alternatives are determined. The highest relative closeness value is considered as the best alternative solution. To calculate the closeness index Eq. 14 is considered.

$$C_i = \frac{D_i^-}{D_i^* + D_i^-} \quad (14)$$

Table A. 1: HFL-TOPSIS for ranking <sup>8</sup>

| Linguistic Variable | Abb. | Fuzzy number |
|---------------------|------|--------------|
| Highly unsatisfied  | HU   | (1,1,3)      |
| Unsatisfied         | U    | (1,3,5)      |
| Fair                | F    | (3,5,7)      |
| Satisfied           | S    | (5,7,9)      |
| Highly satisfied    | HS   | (7,9,9)      |

## B. Results:

### B. 1: Assessment without toxicity:

Table A.2: Crisp values from NEAT-Fuzzy PROMETHEE without toxicity

| Alternatives |    | Crisp phi plus | Rank | Crisp phi plus | Crisp phi minus |
|--------------|----|----------------|------|----------------|-----------------|
| NMC 111      | A1 | -0.4839        | 24   | 0.2414         | 0.7253          |
| NMC 622      | A2 | -0.2727        | 19   | 0.3329         | 0.6056          |

|                                                                                           |     |         |    |        |        |
|-------------------------------------------------------------------------------------------|-----|---------|----|--------|--------|
| NaMnO <sub>2</sub>                                                                        | A3  | 0.0701  | 13 | 0.4479 | 0.3779 |
| Na <sub>0.67</sub> Mn <sub>0.95</sub> Mg <sub>0.05</sub> O <sub>2</sub>                   | A4  | -0.1095 | 16 | 0.3619 | 0.4715 |
| NaMn <sub>0.5</sub> Fe <sub>0.5</sub> O <sub>2</sub>                                      | A5  | -0.3547 | 22 | 0.2374 | 0.5921 |
| NaNi <sub>0.5</sub> Mn <sub>0.5</sub> O <sub>2</sub>                                      | A6  | -0.2467 | 18 | 0.3154 | 0.5618 |
| Na <sub>0.9</sub> [Mn <sub>0.4</sub> Fe <sub>0.5</sub> Ti <sub>0.1</sub> ]O <sub>2</sub>  | A7  | -0.3359 | 21 | 0.24   | 0.5758 |
| NaMn <sub>0.33</sub> Fe <sub>0.33</sub> Ni <sub>0.33</sub> O <sub>2</sub>                 | A8  | 0.2305  | 9  | 0.5098 | 0.2793 |
| Na <sub>0.6</sub> Fe <sub>0.11</sub> Mn <sub>0.66</sub> Ni <sub>0.22</sub> O <sub>2</sub> | A9  | -0.3911 | 23 | 0.2313 | 0.6221 |
| NaMn <sub>0.3</sub> Fe <sub>0.4</sub> Ni <sub>0.3</sub> O <sub>2</sub>                    | A10 | 0.0828  | 12 | 0.4531 | 0.3704 |
| Na <sub>0.6</sub> Fe <sub>0.2</sub> Mn <sub>0.65</sub> Ni <sub>0.15</sub> O <sub>2</sub>  | A11 | 0.4301  | 3  | 0.611  | 0.181  |
| Na <sub>0.6</sub> Ni <sub>0.22</sub> Al <sub>0.11</sub> Mn <sub>0.66</sub> O <sub>2</sub> | A12 | 0.4918  | 2  | 0.6408 | 0.149  |
| LiFePO <sub>4</sub> (LFP)                                                                 | A13 | 0.2185  | 11 | 0.4963 | 0.2777 |
| Na <sub>3</sub> V <sub>2</sub> (PO <sub>4</sub> ) <sub>3</sub>                            | A14 | -0.7607 | 26 | 0.1058 | 0.8665 |
| Na <sub>1.7</sub> O <sub>2</sub> Fe <sub>3</sub> (PO <sub>4</sub> ) <sub>3</sub>          | A15 | -0.0239 | 15 | 0.3804 | 0.4044 |
| Na <sub>2</sub> MnPO <sub>4</sub> F                                                       | A16 | 0.3675  | 5  | 0.5767 | 0.2093 |
| Na <sub>2</sub> MnFe(CN) <sub>6</sub>                                                     | A17 | 0.3246  | 7  | 0.575  | 0.2504 |
| Na <sub>0.61</sub> Fe[Fe(CN) <sub>6</sub> ] <sub>0.94</sub>                               | A18 | 0.3607  | 6  | 0.5882 | 0.2274 |
| Na <sub>0.81</sub> Fe[Fe(CN) <sub>6</sub> ] <sub>0.79</sub>                               | A19 | 0.2751  | 8  | 0.5511 | 0.2761 |
| Na <sub>2</sub> FeSiO <sub>4</sub>                                                        | A20 | 0.5732  | 1  | 0.7071 | 0.1339 |
| Na <sub>2</sub> MnSiO <sub>4</sub>                                                        | A21 | 0.4047  | 4  | 0.5928 | 0.1883 |
| NaFePO <sub>4</sub>                                                                       | A22 | 0.0462  | 14 | 0.4047 | 0.3586 |
| Na <sub>4</sub> MnV(PO <sub>4</sub> ) <sub>3</sub>                                        | A23 | -0.5955 | 25 | 0.1463 | 0.7418 |
| Na <sub>3</sub> MnTi(PO <sub>4</sub> ) <sub>3</sub>                                       | A24 | -0.2201 | 17 | 0.2939 | 0.514  |
| Na <sub>3</sub> MnTi(PO <sub>4</sub> ) <sub>3</sub>                                       | A25 | 0.2209  | 10 | 0.4954 | 0.2745 |
| Na <sub>3</sub> MnZr(PO <sub>4</sub> ) <sub>3</sub>                                       | A26 | -0.2999 | 20 | 0.2632 | 0.5631 |

## B.2: Assessment with toxicity:

Table A.3: Crisp values from NEAT-Fuzzy PROMETHEE with toxicity

| Alternatives                                                            |    | Crisp phi plus | Rank | Crisp phi plus | Crisp phi minus |
|-------------------------------------------------------------------------|----|----------------|------|----------------|-----------------|
| NMC 111                                                                 | A1 | -0.7513        | 26   | 0.1071         | 0.8584          |
| NMC 622                                                                 | A2 | -0.5759        | 24   | 0.1798         | 0.7557          |
| NaMnO <sub>2</sub>                                                      | A3 | 0.0056         | 14   | 0.4089         | 0.4034          |
| Na <sub>0.67</sub> Mn <sub>0.95</sub> Mg <sub>0.05</sub> O <sub>2</sub> | A4 | -0.1387        | 19   | 0.34           | 0.4789          |

|                                                                                           |     |         |    |        |        |
|-------------------------------------------------------------------------------------------|-----|---------|----|--------|--------|
| NaMn <sub>0.5</sub> Fe <sub>0.5</sub> O <sub>2</sub>                                      | A5  | -0.2088 | 21 | 0.3036 | 0.5124 |
| NaNi <sub>0.5</sub> Mn <sub>0.5</sub> O <sub>2</sub>                                      | A6  | -0.055  | 16 | 0.4071 | 0.4618 |
| Na <sub>0.9</sub> [Mn <sub>0.4</sub> Fe <sub>0.5</sub> Ti <sub>0.1</sub> ]O <sub>2</sub>  | A7  | -0.1858 | 20 | 0.3086 | 0.4942 |
| NaMn <sub>0.33</sub> Fe <sub>0.33</sub> Ni <sub>0.33</sub> O <sub>2</sub>                 | A8  | 0.0209  | 13 | 0.401  | 0.3802 |
| Na <sub>0.6</sub> Fe <sub>0.11</sub> Mn <sub>0.66</sub> Ni <sub>0.22</sub> O <sub>2</sub> | A9  | -0.3713 | 22 | 0.2363 | 0.6073 |
| NaMn <sub>0.3</sub> Fe <sub>0.4</sub> Ni <sub>0.3</sub> O <sub>2</sub>                    | A10 | 0.2542  | 8  | 0.534  | 0.2799 |
| Na <sub>0.6</sub> Fe <sub>0.2</sub> Mn <sub>0.65</sub> Ni <sub>0.15</sub> O <sub>2</sub>  | A11 | 0.3575  | 5  | 0.5684 | 0.211  |
| Na <sub>0.6</sub> Ni <sub>0.22</sub> Al <sub>0.11</sub> Mn <sub>0.66</sub> O <sub>2</sub> | A12 | 0.1742  | 10 | 0.4759 | 0.3018 |
| LiFePO <sub>4</sub> (LFP)                                                                 | A13 | -0.0029 | 15 | 0.3806 | 0.3833 |
| Na <sub>3</sub> V <sub>2</sub> (PO <sub>4</sub> ) <sub>3</sub>                            | A14 | -0.7278 | 25 | 0.1221 | 0.8499 |
| Na <sub>1.7</sub> O <sub>2</sub> Fe <sub>3</sub> (PO <sub>4</sub> ) <sub>3</sub>          | A15 | 0.0333  | 12 | 0.4028 | 0.3697 |
| Na <sub>2</sub> MnPO <sub>4</sub> F                                                       | A16 | 0.3259  | 6  | 0.552  | 0.2262 |
| Na <sub>2</sub> MnFe(CN) <sub>6</sub>                                                     | A17 | 0.449   | 4  | 0.6308 | 0.1819 |
| Na <sub>0.61</sub> Fe[Fe(CN) <sub>6</sub> ] <sub>0.94</sub>                               | A18 | 0.4948  | 1  | 0.6449 | 0.1501 |
| Na <sub>0.81</sub> Fe[Fe(CN) <sub>6</sub> ] <sub>0.79</sub>                               | A19 | 0.4615  | 3  | 0.6333 | 0.1719 |
| Na <sub>2</sub> FeSiO <sub>4</sub>                                                        | A20 | 0.4696  | 2  | 0.6486 | 0.1791 |
| Na <sub>2</sub> MnSiO <sub>4</sub>                                                        | A21 | 0.2805  | 7  | 0.5266 | 0.2462 |
| NaFePO <sub>4</sub>                                                                       | A22 | 0.2429  | 9  | 0.5009 | 0.2581 |
| Na <sub>4</sub> MnV(PO <sub>4</sub> ) <sub>3</sub>                                        | A23 | -0.5638 | 23 | 0.1581 | 0.7219 |
| Na <sub>3</sub> MnTi(PO <sub>4</sub> ) <sub>3</sub>                                       | A24 | -0.0879 | 18 | 0.3566 | 0.4445 |
| Na <sub>3</sub> MnTi(PO <sub>4</sub> ) <sub>3</sub>                                       | A25 | 0.1623  | 11 | 0.4618 | 0.2996 |
| Na <sub>3</sub> MnZr(PO <sub>4</sub> ) <sub>3</sub>                                       | A26 | -0.0609 | 17 |        |        |

#### References:

- 1 M. Baumann, M. Häringer, M. Schmidt, L. Schneider, J. F. Peters, W. Bauer, J. R. Binder and M. Weil, *Adv. Energy Mater.*, DOI:10.1002/aenm.202202636.
- 2 T. Jin, H. Li, K. Zhu, P. F. Wang, P. Liu and L. Jiao, *Chem. Soc. Rev.*, 2020, **49**, 2342–2377.
- 3 G. Büyüközkan and M. Güler, *Measurement*, 2020, **153**, 107353.
- 4 G. Büyüközkan, Y. Karabulut and E. Mukul, *Energy*, 2018, **165**, 290–302.
- 5 B. Zhu, Z. Xu, R. Zhang and M. Hong, *Eur. J. Oper. Res.*, 2016, **250**, 602–614.
- 6 G. Büyüközkan, E. Mukul and E. Kongar, *Socioecon. Plann. Sci.*, DOI:10.1016/j.seps.2020.100929.
- 7 S. Das, M. Baumann and M. Weil, *Energy Convers. Manag.*, 2025, **328**, 119594.

- 8 S. Das and S. De, *Energy Convers. Manag.*, 2023, **281**, 116847.
- 9 S. Cevik Onar, B. Oztaysi and C. Kahraman, *Int. J. Comput. Intell. Syst.*, 2014, **7**, 1002–1021.
